# Supplementary material
Source: PubMed Central journal article supplement (PMC3012515)
Supplement: 1015962107_pnas.201015962SI.pdf [file 1015962107_pnas.201015962SI.pdf]

# Supporting Information

Easterlin et al. 10.1073/pnas.1015962107

Table S1. Annual change in financial satisfaction as given by regression coefficients and growth rate of GDP per capita, 17 Latin American countries, 1994–2006

| Country     | Annual change in financial satisfaction<br>(absolute amount on 1–5 scale) | Annual growth rate of<br>GDP per capita |
|-------------|---------------------------------------------------------------------------|-----------------------------------------|
| Argentina   | 0.037                                                                     | 0.2                                     |
| Bolivia     | −0.001                                                                    | 0.9                                     |
| Brazil      | 0.018                                                                     | 0.9                                     |
| Colombia    | 0.016                                                                     | 0.9                                     |
| Costa Rica  | 0.014                                                                     | 2.5                                     |
| Chile       | 0.010                                                                     | 2.6                                     |
| Ecuador     | −0.024                                                                    | 1.8                                     |
| El Salvador | −0.034                                                                    | 1.0                                     |
| Guatemala   | 0.004                                                                     | 1.1                                     |
| Honduras    | 0.022                                                                     | 1.8                                     |
| Mexico      | 0.050                                                                     | 2.0                                     |
| Nicaragua   | 0.002                                                                     | 2.2                                     |
| Panama      | −0.005                                                                    | 2.5                                     |
| Paraguay    | −0.004                                                                    | −0.9                                    |
| Peru        | 0.000                                                                     | 1.9                                     |
| Uruguay     | 0.003                                                                     | 0.4                                     |
| Venezuela   | 0.038                                                                     | −0.7                                    |

**Table S2. Annual change in life satisfaction as given by regression coefficients and growth rate of GDP per capita, 17 developed, 11 transition, and 9 developing countries**

| Country          | Annual change in life satisfaction<br>(absolute amount on 1–10 scale) | Annual growth rate of<br>GDP per capita (%) |
|------------------|-----------------------------------------------------------------------|---------------------------------------------|
| Belgium          | −0.014                                                                | 1.9                                         |
| Netherlands      | 0.006                                                                 | 1.8                                         |
| Luxembourg       | 0.013                                                                 | 3.6                                         |
| France           | 0.014                                                                 | 1.8                                         |
| Italy            | 0.029                                                                 | 2.0                                         |
| Germany          | 0.001                                                                 | 2.0                                         |
| Great Britain    | 0.004                                                                 | 2.1                                         |
| Northern Ireland | 0.018                                                                 | 2.7                                         |
| Ireland          | 0.004                                                                 | 4.4                                         |
| Denmark          | 0.014                                                                 | 1.7                                         |
| Greece           | −0.001                                                                | 1.6                                         |
| Portugal         | −0.022                                                                | 2.6                                         |
| Spain            | 0.018                                                                 | 2.6                                         |
| Norway           | 0.002                                                                 | 2.5                                         |
| United States    | 0.000                                                                 | 2.0                                         |
| Canada           | −0.005                                                                | 1.9                                         |
| Australia        | −0.027                                                                | 2.2                                         |
| Poland           | 0.026                                                                 | 2.4                                         |
| Hungary          | −0.036                                                                | 1.5                                         |
| Estonia          | 0.029                                                                 | 0.6                                         |
| Latvia           | 0.042                                                                 | −0.3                                        |
| Lithuania        | 0.009                                                                 | −0.8                                        |
| Russia           | 0.057                                                                 | −0.7                                        |
| East Germany     | 0.003                                                                 | 0.7                                         |
| Czech Republic   | 0.026                                                                 | 2.1                                         |
| Slovakia         | −0.013                                                                | 2.8                                         |
| Bulgaria         | 0.017                                                                 | 1.7                                         |
| Romania          | 0.003                                                                 | 2.7                                         |
| Argentina        | 0.034                                                                 | 1.1                                         |
| Brazil           | 0.006                                                                 | 1.3                                         |
| Chile            | −0.027                                                                | 4.0                                         |
| Mexico           | 0.063                                                                 | 1.6                                         |
| China            | −0.010                                                                | 9.3                                         |
| South Korea      | 0.031                                                                 | 5.4                                         |
| Turkey           | 0.048                                                                 | 2.3                                         |
| South Africa     | 0.011                                                                 | 0.2                                         |
| Japan            | 0.018                                                                 | 5.5                                         |

**Table S3. Annual deviation from trend in financial satisfaction and in log GDP per capita, 17 Latin American countries**

| Year    | Argentina     |           | Bolivia       |           | Brazil        |           | Colombia      |           | Costa Rica    |           |
|---------|---------------|-----------|---------------|-----------|---------------|-----------|---------------|-----------|---------------|-----------|
|         | Dev in logGDP | Dev in FS |
| 1994.5  | -0.020        | 0.232     |               |           | 0.005         | 0.097     |               |           |               |           |
| 1995.75 | -0.022        | 0.065     | -0.013        | 0.041     | 0.013         | 0.039     | 0.038         | 0.235     | -0.014        | -0.106    |
| 1997    | 0.062         | 0.020     | 0.010         | 0.052     | 0.021         | 0.071     | 0.041         | 0.141     | -0.010        | 0.000     |
| 1998    | 0.086         | -0.036    | 0.029         | 0.092     | -0.003        | -0.057    | 0.021         | -0.096    | 0.020         | 0.096     |
| 1999    | 0.039         | -0.043    | 0.004         | 0.033     | -0.025        | -0.016    | -0.047        | -0.102    | 0.049         | 0.142     |
| 2000.25 | -0.010        | -0.178    | -0.007        | -0.096    | -0.006        | -0.104    | -0.045        | -0.356    | 0.000         | -0.079    |
| 2001.5  | -0.101        | -0.475    | -0.016        | -0.096    | -0.016        | -0.031    | -0.047        | -0.082    | -0.026        | 0.117     |
| 2002.5  | -0.129        | -0.062    | -0.019        | -0.215    | -0.020        | -0.190    | -0.036        | -0.059    | -0.026        | -0.187    |
| 2003.5  | -0.055        | 0.122     | -0.014        | -0.085    | -0.009        | -0.098    | -0.014        | 0.035     | -0.018        | -0.041    |
| 2004.5  | 0.021         | 0.055     | 0.000         | 0.036     | 0.011         | 0.053     | 0.014         | 0.129     | -0.012        | -0.025    |
| 2006    | 0.128         | 0.300     | 0.027         | 0.237     | 0.029         | 0.236     | 0.076         | 0.155     | 0.037         | 0.084     |
|         | Chile         |           | Ecuador       |           | El Salvador   |           | Guatemala     |           | Honduras      |           |
| 1994.5  | -0.038        | 0.110     |               |           |               |           |               |           |               |           |
| 1995.75 | 0.006         | 0.050     | 0.044         | 0.172     | -0.012        | -0.059    | -0.015        | -0.011    | 0.020         | -0.242    |
| 1997    | 0.044         | 0.144     | 0.044         | 0.158     | 0.000         | 0.175     | -0.006        | -0.054    | 0.030         | 0.017     |
| 1998    | 0.036         | -0.116    | 0.032         | -0.088    | 0.007         | 0.119     | 0.010         | 0.162     | 0.020         | 0.235     |
| 1999    | -0.011        | -0.046    | -0.065        | -0.194    | 0.013         | -0.137    | 0.013         | 0.068     | -0.037        | 0.253     |
| 2000.25 | -0.008        | -0.201    | -0.068        | -0.050    | 0.007         | -0.233    | 0.009         | -0.088    | -0.024        | -0.119    |
| 2001.5  | -0.018        | -0.061    | -0.041        | -0.144    | -0.004        | 0.028     | 0.004         | -0.001    | -0.030        | -0.011    |
| 2002.5  | -0.025        | -0.171    | -0.032        | -0.060    | -0.005        | -0.078    | 0.000         | -0.155    | -0.026        | -0.213    |
| 2003.5  | -0.014        | 0.009     | -0.005        | -0.026    | -0.009        | 0.176     | -0.007        | -0.079    | -0.011        | 0.025     |
| 2004.5  | 0.006         | 0.079     | 0.033         | 0.038     | -0.009        | 0.090     | -0.011        | 0.037     | 0.012         | 0.004     |
| 2006    | 0.022         | 0.203     | 0.057         | 0.194     | 0.012         | -0.079    | 0.003         | 0.122     | 0.046         | 0.051     |
|         | Mexico        |           | Nicaragua     |           | Panama        |           | Paraguay      |           | Peru          |           |
| 1994.5  | 0.006         | -0.186    |               |           |               |           | 0.003         | 0.077     | 0.001         | 0.213     |
| 1995.75 | -0.038        | -0.036    | -0.004        | -0.210    | -0.002        | 0.006     | 0.017         | 0.150     | 0.018         | 0.013     |
| 1997    | 0.000         | 0.248     | -0.006        | 0.118     | 0.015         | 0.111     | 0.030         | -0.024    | 0.045         | 0.023     |
| 1998    | 0.014         | -0.262    | -0.009        | -0.013    |               |           | 0.023         | -0.081    | 0.004         | -0.117    |
| 1999    | 0.018         | 0.117     | 0.020         | 0.245     | 0.035         | 0.302     | -0.014        | -0.027    | -0.020        | -0.027    |
| 2000.25 | 0.032         | 0.272     | 0.020         | -0.028    | -0.001        | -0.370    | -0.044        | -0.242    | -0.024        | -0.116    |
| 2001.5  | 0.005         | 0.111     | 0.002         | 0.100     | -0.031        | -0.225    | -0.045        | 0.082     | -0.045        | -0.086    |
| 2002.5  | -0.014        | -0.069    | -0.017        | -0.202    | -0.042        | -0.089    | -0.037        | -0.175    | -0.033        | -0.166    |
| 2003.5  | -0.017        | -0.069    | -0.013        | -0.054    | -0.028        | 0.096     | -0.008        | -0.001    | -0.020        | -0.046    |
| 2004.5  | -0.012        | -0.010    | 0.000         | -0.016    | 0.000         | -0.029    | 0.017         | 0.113     | 0.006         | 0.074     |
| 2006    | 0.005         | -0.115    | 0.006         | 0.061     | 0.053         | 0.199     | 0.058         | 0.128     | 0.067         | 0.235     |
|         | Uruguay       |           | Venezuela     |           |               |           |               |           |               |           |
| 1994.5  | -0.032        | 0.005     | 0.004         | 0.077     |               |           |               |           |               |           |
| 1995.75 | -0.022        | 0.042     | 0.008         | -0.052    |               |           |               |           |               |           |
| 1997    | 0.038         | 0.077     | 0.050         | 0.141     |               |           |               |           |               |           |
| 1998    | 0.073         | 0.024     | 0.040         | 0.142     |               |           |               |           |               |           |
| 1999    | 0.036         | 0.021     |               |           |               |           |               |           |               |           |
| 2000.25 | 0.013         | -0.042    | -0.008        | 0.036     |               |           |               |           |               |           |
| 2001.5  |               |           | -0.036        | -0.392    |               |           |               |           |               |           |
| 2002.5  | -0.139        | -0.319    | -0.134        | -0.421    |               |           |               |           |               |           |
| 2003.5  | -0.074        | -0.132    | -0.099        | -0.029    |               |           |               |           |               |           |
| 2004.5  | 0.008         | 0.115     | 0.022         | 0.233     |               |           |               |           |               |           |
| 2006    | 0.098         | 0.210     | 0.154         | 0.265     |               |           |               |           |               |           |

Dev, deviation.

**Table S4. Mean annual deviation in financial satisfaction and in log GDP per capita, 17 Latin American countries**

| Year    | Deviations in log GDP | Deviations in FS |
|---------|-----------------------|------------------|
| 1994.5  | -0.033                | -0.005           |
| 1995.75 | -0.023                | -0.078           |
| 1997    | 0.000                 | 0.000            |
| 1998    | 0.001                 | -0.083           |
| 1999    | -0.023                | -0.047           |
| 2000.25 | -0.034                | -0.201           |
| 2001.5  | -0.052                | -0.156           |
| 2002.5  | -0.067                | -0.250           |
| 2003.5  | -0.048                | -0.095           |
| 2004.5  | -0.018                | -0.026           |
| 2006    | 0.028                 | 0.063            |

**Table S5. Life satisfaction and annual index of real GDP, three transition countries, 1989-2005**

| Year   | GDR               |                        | Estonia           |                        | Russia            |                        |
|--------|-------------------|------------------------|-------------------|------------------------|-------------------|------------------------|
|        | Life satisfaction | GDP index (1989 = 100) | Life satisfaction | GDP index (1989 = 100) | Life satisfaction | GDP index (1989 = 100) |
| 1989   |                   | 100.0                  |                   | 100.0                  |                   | 100.0                  |
| 1989.5 | 6.590             | 92.3                   | 5.997             | 96.0                   |                   | 98.5                   |
| 1990   |                   | 84.5                   |                   | 91.9                   | 5.375             | 97.0                   |
| 1991   | 6.040             | 68.3                   |                   | 82.7                   |                   | 92.2                   |
| 1992   | 6.120             | 73.3                   |                   | 71.0                   |                   | 78.8                   |
| 1993   | 6.200             | 80.1                   |                   | 65.0                   |                   | 71.9                   |
| 1994   | 6.250             | 87.9                   |                   | 63.7                   |                   | 62.8                   |
| 1995   | 6.380             | 91.9                   |                   | 66.4                   | 4.453             | 60.2                   |
| 1996   | 6.390             | 94.9                   | 4.997             | 69.0                   |                   | 58.2                   |
| 1997   | 6.310             | 96.7                   |                   | 75.7                   |                   | 58.7                   |
| 1998   | 6.480             | 97.7                   |                   | 79.2                   |                   | 55.9                   |
| 1989.5 |                   |                        |                   |                        | 4.737             | 57.4                   |
| 1999   | 6.510             | 99.0                   | 5.899             | 78.7                   |                   | 58.9                   |
| 2000   | 6.440             | 100.0                  |                   | 84.3                   |                   | 64.2                   |
| 2001   | 6.450             | 99.9                   |                   | 88.6                   |                   | 67.4                   |
| 2002   | 6.260             | 100.0                  |                   | 93.6                   |                   | 70.2                   |
| 2003   | 6.340             | 99.8                   |                   | 100.6                  |                   | 75.7                   |
| 2004   | 6.130             | 101.4                  | 6.319             | 109.1                  |                   | 81.6                   |
| 2005   | 6.320             | 102.5                  |                   |                        | 6.093             | 87.2                   |
